# Supplementary material
Source: PubMed Central journal article supplement (PMC7725223)
Supplement: NIHMS1650956-supplement-Supplementary_Material.pdf [file NIHMS1650956-supplement-Supplementary_Material.pdf]

## **Data Supplement**

### **Vascular Dysfunction, Oxidative Stress, and Inflammation in Chronic Kidney Disease**

Kristen L Nowak PhD, MPH<sup>1</sup>, Anna Jovanovich, MD<sup>1,2</sup>, Heather Farmer-Bailey, BSN<sup>1</sup>, Nina Bispham, MS<sup>1</sup>, Taylor Struempf, BS<sup>1</sup>, Mikaela Malaczewski, BS<sup>1</sup>, Wei Wang, MD<sup>1</sup>, Michel Chonchol, MD<sup>1</sup>

<sup>1</sup> University of Colorado Anschutz Medical Campus, Aurora, CO

<sup>2</sup> Rocky Mountain Regional VA Medical Center, Aurora, CO

## Supplemental Table 1

**Table 1:** Number of participants included in the assessment of each outcome measure

| Variable                                           | CKD<br>(total n=64) | Control<br>(total n=17) |
|----------------------------------------------------|---------------------|-------------------------|
| FMD <sub>BA</sub>                                  | 64                  | 17                      |
| Endothelium-independent dilation to sublingual NTG | 48                  | 1                       |
| Carotid-femoral PWV                                | 61                  | 16                      |
| Carotid-radial PWV                                 | 62                  | 17                      |
| Carotid compliance/ $\beta$ -stiffness index       | 60                  | 17                      |
| cIMT                                               | 62                  | 17                      |
| Carotid SBP                                        | 62                  | 17                      |
| $\Delta$ FMD <sub>BA</sub> with ascorbic acid      | 60                  | 17                      |
| Vascular endothelial cell protein expression:      |                     |                         |
| NAD(P)H oxidase                                    | 34                  | 8                       |
| Interleukin-6                                      | 38                  | 9                       |
| Nuclear factor $\kappa$ B                          | 37                  | 11                      |
| PeNOS                                              | 24                  | 10                      |
| Circulating markers:                               |                     |                         |
| C-reactive protein                                 | 58                  | 17                      |
| Interleukin-6                                      | 57                  | 17                      |
| Oxidized LDL                                       | 57                  | 17                      |

FMD<sub>BA</sub>, brachial artery flow-mediated dilation; NTG, nitroglycerin; PWV, pulse-wave velocity; cIMT, carotid intimal medial thickness; SBP, systolic blood pressure; PeNOS, phosphorylated endothelial nitric oxide synthase; LDL, low density lipoprotein
